# Supplementary material for: An index to characterize female career promotion in academic medicine
Source: J Occup Med Toxicol. 2017 Jul 21;12:18. doi: 10.1186/s12995-017-0164-7 (PMC5521076; doi:10.1186/s12995-017-0164-7)
Supplement: Additional file 1: — Equations. (DOCX 525 kb) [file 12995_2017_164_MOESM1_ESM.docx]

**Equations**

Equation (1)

Equation (2)

Equation (3)

Equation (4)

Equation (5)

Equation (6)

Equation (7)

Equation (8)

Equation (9)

Equation (10)

Equation (11)

Equation (12)

Equation (13) Final index for OB/GYN in 2008:

Equation (14) Final index for OB/GYN in 2003:

Equation (15) Final index for OB/GYN in 1998:

Equation (16) Final index for ENT in 2008:

Equation (17) Index for ENT in 2003:

Equation (18) Index for ENT in 1998:
